# Supplementary material
Source: Springer Nature journal article supplement (https://www.springermedizin.de/resource/supplementary/13063_2010_540_MOESM2_ESM.pdf/9618822)
Supplement: MOESM2 [file 9618822]

| Time Line                                                     | Standard COPD Service (Control) | Tele-health Supported COPD Service |
|---------------------------------------------------------------|---------------------------------|------------------------------------|
| First home visit after hospital discharge (Baseline (time 0)) | (a) (b) (c)<br>[d] [e]          | (a) (b) (c) (g)<br>[d] [e]         |
| Randomisation                                                 |                                 |                                    |
| 1 day                                                         |                                 | [l]                                |
| 2 days                                                        | (a) (c)                         |                                    |
| 4 days                                                        | (f) (c) (g)<br>[i]              |                                    |
| 14 days                                                       | (f) (h)<br>[j]                  | [m]                                |
| 6 weeks                                                       | (f) (h)<br>[j]                  |                                    |
| 8 weeks                                                       | (f) (h) (c)<br>[e] [j] (k)      | (f) (h) (c)<br>[e] [j] (k) [n]     |
| 8 months                                                      | Measurement of outcomes         |                                    |

|     |                                                                                                                                                   |
|-----|---------------------------------------------------------------------------------------------------------------------------------------------------|
| (a) | Clinical assessment of stability and coping with discharge by COPD clinicians (part of standard clinical intervention)                            |
| (b) | Social assessment (part of standard clinical intervention)                                                                                        |
| (c) | Patient education / self management session (duration unspecified) - (part of standard clinical intervention)                                     |
| [d] | Clinician to seek written consent from patient (see appendix 2 for copy of consent form)                                                          |
| [e] | St. George's Respiratory Questionnaire on health status and quality of life completed by patient                                                  |
| (f) | Clinical assessment - (part of standard clinical intervention)                                                                                    |
| (g) | Patient self-management plan put in place - (part of standard clinical intervention)                                                              |
| (h) | Patient self-management assessed - (part of standard clinical intervention)                                                                       |
| [i] | Self-report diary for health resource use explained to the patient by the clinician and implemented (see appendices 4a, b and c for diary sheets) |
| [j] | Review of self-diary resource use by research staff                                                                                               |
| (k) | Patient discharged from the clinical programme if determined stable by clinical staff - (part of standard clinical intervention)                  |
| [l] | Tele-health equipment installed in patient's home by Local Authority installer and training provided                                              |
| [m] | Tele-health alert parameters reviewed and adjusted remotely by admin/clerical staff as directed by clinicians                                     |
| [n] | Tele-health service satisfaction questionnaire completed by patient                                                                               |
